# Supplementary material for: Open, High-Resolution EI+ Spectral Library of Anthropogenic Compounds
Source: PubMed Central journal article supplement (PMC7985345; doi:10.3389/fpubh.2021.622558), 2021-03-09
Supplement: Table_1.pdf [file Table_1.pdf]

# Open, high-resolution EI+ spectral library of anthropogenic compounds

**Elliott J. Price<sup>1,2\*</sup>, Jiří Palát<sup>2</sup>, Kateřina Coufaliková<sup>2</sup>, Petr Kukučka<sup>2</sup>, Garry Codling<sup>2</sup>, Chiara Maria Vitale<sup>2</sup>, Štěpán Koudelka<sup>2</sup>, Jana Klánová<sup>2</sup>**

<sup>1</sup>Faculty of Sports Studies, Masaryk University, Brno, Czech Republic

<sup>2</sup>RECETOX Centre, Masaryk University, Brno, Czech Republic

## Supplementary Tables

Supplementary Table 1. Match scores, retention index comparisons, presence on HBM4EU CECscreen and other openly available libraries.

Supplementary Table 1. Match scores, retention index comparisons, presence on HBM4EU CECscreen and other openly available libraries.

| Name                                                                     | NIST Match | HBM4EU CECscreen | Experimental RI | NIST consensus semi non-polar RI | Common with open libraries |
|--------------------------------------------------------------------------|------------|------------------|-----------------|----------------------------------|----------------------------|
| 1,1-Dibromo-2,3,3,4,4,5-hexachloro-2-cyclopenta-2,4-dien-1-ylcyclooctane |            |                  | 2836.80         |                                  |                            |
| 1,2,3,4,6,7,8-Heptachlorodibenzofuran                                    |            | Y                | 2904.35         | 2898                             |                            |
| 1,2,3,4,6,7,8-Heptachlorodibenzo-p-dioxin                                |            |                  | 2956.73         | 2994                             |                            |
| 1,2,3,4,7,8-Hexachlorodibenzofuran                                       |            | Y                | 2705.67         |                                  |                            |
| 1,2,3,4,7,8-Hexachlorodibenzo-p-dioxin                                   | 774        | Y                | 2796.54         | 2781                             |                            |
| 1,2,3,7,8-Pentachlorodibenzofuran                                        | 878        | Y                | 2496.11         | 2507                             |                            |
| 1,2,3,7,8-Pentachlorodibenzo-p-dioxin                                    | 890        | Y                | 2561.60         | 2587                             |                            |
| 1,2,5,6-Tetrabromocyclooctane                                            | 862        | Y                | 2074.80         |                                  |                            |
| 1,2,7,9-Tetrachlorodibenzofuran                                          | 835        | Y                | 2336.90         |                                  |                            |
| 1,2,7,9-Tetrachlorodibenzo-p-dioxin                                      | 737        |                  | 2339.30         |                                  |                            |
| 1,2-Benzanthraquinone                                                    | 929        | Y                | 2588.46         | 2500                             |                            |
| 1,2-Dimethylnaphthalene                                                  | 882        |                  | 1432.00         | 1452                             | Y                          |
| 1,3-Dimethylnaphthalene                                                  | 924        | Y                | 1395.40         | 1417                             |                            |
| 1,4-Chrysenequinone                                                      | 520        | Y                | 2717.18         |                                  |                            |
| 1,4-Dimethylnaphthalene                                                  | 815        | Y                | 1414.30         | 1436                             |                            |
| 1,4-Naphthoquinone                                                       | 705        | Y                | 1371.54         | 1404                             |                            |
| 1,5-Dimethylnaphthalene                                                  | 632        | Y                | 1418.00         | 1440                             |                            |
| 1,8-Dimethylnaphthalene                                                  | 925        | Y                | 1452.80         | 1472                             |                            |
| 17-alpha-Ethynylestradiol                                                | 884        | Y                | 2792.70         | 2783                             |                            |
| 17-beta-Estradiol                                                        | 769        | Y                | 2723.00         | 2717                             |                            |
| 1-Fluoronaphthalene                                                      | 891        | Y                | 1196.42         | 1207                             |                            |
| 1-Methylnaphthalene                                                      | 974        |                  | 1286.60         | 1307                             | Y                          |
| 1-Methylphenanthrene                                                     | 932        | Y                | 1967.30         | 1900                             |                            |
| 1-Nitronaphthalene                                                       | 843        | Y                | 1569.52         | 1612                             | Y                          |
| 2,2',3,3',4,4',5,5',6-Nonachlorobiphenyl                                 | 867        | Y                | 2778.40         |                                  |                            |

| Name                                           | NIST Match | HBM4EU CECscreen | Experimental RI | NIST consensus semi non-polar RI | Common with open libraries |
|------------------------------------------------|------------|------------------|-----------------|----------------------------------|----------------------------|
| 2,2',3,3',4,4',5-Heptachlorobiphenyl           | 928        | Y                | 2566.50         | 2532                             |                            |
| 2,2',3,3',4,5',6,6'-Octachlorobiphenyl         | 659        | Y                | 2473.00         | 2518                             |                            |
| 2,2',3,4,4',5,5'-Heptachlorobiphenyl           | 862        | Y                | 2504.78         | 2484                             |                            |
| 2,2',3,4,4',5',6-Heptabromodiphenyl ether      | 523        | Y                | 3206.14         |                                  |                            |
| 2,2',3,4,4',5',6-Heptachlorobiphenyl           | 927        | Y                | 2386.00         | 2392                             |                            |
| 2,2',3',4,4',5-Hexachloro-3-methoxybiphenyl    |            |                  | 2492.51         |                                  |                            |
| 2,2',3,4,4',5'-Hexachlorobiphenyl              |            | Y                | 2356.30         | 2345                             |                            |
| 2,2',3,4',5,5',6-Heptachloro-4-methoxybiphenyl |            |                  | 2592.52         |                                  |                            |
| 2,2',3,4,5,5',6-Heptachlorobiphenyl            | 879        | Y                | 2425.21         | 2389                             |                            |
| 2,2',3,4',5,5',6-Heptachlorobiphenyl           | 931        | Y                | 2394.20         | 2378                             |                            |
| 2,2',3,4',5,5'-Hexachloro-4-methoxybiphenyl    |            |                  | 2554.15         |                                  |                            |
| 2,2',3,4,5,5'-Hexachlorobiphenyl               | 919        | Y                | 2321.77         | 2315                             |                            |
| 2,2',3,4,5'-Pentachlorobiphenyl                | 864        | Y                | 2162.46         | 2162                             |                            |
| 2,2',3,4',5-Pentachlorobiphenyl                | 905        | Y                | 2134.21         | 2074                             |                            |
| 2,2',3,5,5',6-Hexachlorobiphenyl               | 854        | Y                | 2211.16         | 2198                             |                            |
| 2,2',3,5'-Tetrachlorobiphenyl                  | 941        | Y                | 1962.88         | 1965                             |                            |
| 2,2',4,4',5,5'-Hexachlorobiphenyl              |            | Y                | 2293.50         | 2300                             |                            |
| 2,2',4,5,5'-Pentachlorobiphenyl                | 820        | Y                | 2135.00         | 2117                             |                            |
| 2,2',5,5'-Tetrachlorobiphenyl                  | 912        | Y                | 1967.40         | 1933                             |                            |
| 2,2',5-Trichlorobiphenyl                       | 892        | Y                | 1753.31         | 1774                             |                            |
| 2,3,3',4',5,5',6-Heptachlorobiphenyl           |            | Y                | 2504.60         | 2482                             |                            |
| 2,3,3',4,5,6-Hexachlorobiphenyl                | 897        | Y                | 2357.83         | 2362                             |                            |
| 2,3,3',4',5,6-Hexachlorobiphenyl               | 866        |                  | 2360.80         | 2350                             |                            |
| 2,3,3',4',5',6-Hexachlorobiphenyl              | 900        | Y                | 2356.10         | 2317                             |                            |
| 2,3,3',4,5-Pentachlorobiphenyl                 | 908        | Y                | 2258.70         | 2207                             |                            |
| 2,3,3',4',6-Pentachlorobiphenyl                | 932        | Y                | 2183.98         | 2185                             |                            |

| Name                                                      | NIST Match | HBM4EU CECscreen | Experimental RI | NIST consensus semi non-polar RI | Common with open libraries |
|-----------------------------------------------------------|------------|------------------|-----------------|----------------------------------|----------------------------|
| 2,3',4,4',5',6-Hexachlorobiphenyl                         | 887        | Y                | 2305.40         | 2447                             |                            |
| 2,3',4,4',5-Pentachlorobiphenyl                           | 926        | Y                | 2262.45         | 2194                             |                            |
| 2,3',4,4'-Tetrachlorobiphenyl                             | 867        | Y                | 2053.00         | 2056                             |                            |
| 2,3,4,5,6-Pentabromobenzyl alcohol                        |            |                  | 2726.00         |                                  |                            |
| 2,3,4,5,6-Pentabromoethylbenzene                          | 913        | Y                | 2323.70         |                                  |                            |
| 2,3,4,5,6-Pentabromotoluene                               | 895        |                  | 2270.30         |                                  |                            |
| 2,3,4,5-Tetrabromo-6-chlorotoluene                        | 826        | Y                | 2139.40         |                                  |                            |
| 2,3',4,6-Tetrachlorobiphenyl                              | 829        | Y                | 1958.00         | 1932                             |                            |
| 2,3,5,6-Tetrabromo-p-xylene                               | 926        | Y                | 2051.40         |                                  |                            |
| 2,3',5',6-Tetrachlorobiphenyl                             | 903        | Y                | 1964.70         | 1959                             |                            |
| 2,3,7,8-Tetrachlorodibenzofuran                           | 835        | Y                | 2314.81         | 2338                             |                            |
| 2,3,7,8-Tetrachlorodibenzo-p-dioxin                       | 868        | Y                | 2347.66         | 2385                             |                            |
| 2,3-Benzofluorene                                         | 914        | Y                | 2257.49         | 2190                             |                            |
| 2,3-Dichlorobiphenyl                                      | 887        | Y                | 1668.15         | 1692                             |                            |
| 2,4,4'-Trichlorobiphenyl                                  | 882        | Y                | 1905.18         | 1861                             |                            |
| 2,4',5-Trichlorobiphenyl                                  | 845        | Y                | 1846.20         | 1859                             |                            |
| 2,4,6-Tribromophenol                                      | 838        | Y                | 1677.90         | 1624                             | Y                          |
| 2,4,6-Trichlorobiphenyl                                   | 888        | Y                | 1796.69         |                                  |                            |
| 2,4-D                                                     | 761        |                  | 1696.60         | 1671                             |                            |
| 2,4'-Dichlorodiphenyldichloroethane                       | 850        | Y                | 2185.62         | 2170                             |                            |
| 2,4'-Dichlorodiphenyldichloroethylene                     | 895        | Y                | 2107.71         | 2097                             |                            |
| 2,4'-Dichlorodiphenyltrichloroethane                      | 894        | Y                | 2336.20         | 2261                             |                            |
| 2,4-Di-tert-butyl-6-(5-chloro-2H-benzotriazol-2-yl)phenol | 752        | Y                | 2652.80         |                                  |                            |
| 2,6-Dichloro-4-nitroaniline                               | 696        |                  | 1755.75         | 1732                             |                            |
| 2,6-Dimethylnaphthalene                                   | 855        | Y                | 1381.90         | 1401                             | Y                          |
| 2-Bromoallyl(2,4,6-tribromophenyl) ether                  |            |                  | 2060.10         |                                  |                            |

| Name                                              | NIST Match | HBM4EU CECscreen | Experimental RI | NIST consensus semi non-polar RI | Common with open libraries |
|---------------------------------------------------|------------|------------------|-----------------|----------------------------------|----------------------------|
| 2-Chlorobiphenyl                                  | 901        | Y                | 1463.02         | 1492                             |                            |
| 2-Ethylhexyl 2,3,4,5-Tetrabromobenzoate           |            | Y                | 2834.10         |                                  |                            |
| 2-Methylnaphthalene                               | 959        | Y                | 1270.17         | 1298                             | Y                          |
| 2-tert-Butyl-4-methoxyphenol                      | 899        | Y                | 1497.77         | 1497                             |                            |
| 3,3',4,5,5'-Pentachlorobiphenyl                   | 919        | Y                | 2316.20         | 2266                             |                            |
| 4,4'-Dichlorodiphenyldichloroethane               | 907        | Y                | 2264.41         | 2257                             |                            |
| 4,4'-Dichlorodiphenyldichloroethylene             | 908        | Y                | 2171.68         | 2168                             |                            |
| 4,4'-Dichlorodiphenyltrichloroethane              | 911        | Y                | 2348.06         | 2334                             |                            |
| 4-Methoxybenzyl alcohol                           | 908        | Y                | 1285.70         | 1290                             | Y                          |
| 4-Methylbenzophenone                              | 768        | Y                | 1786.55         |                                  | Y                          |
| 4-tert-Octylphenol                                | 829        | Y                | 1601.60         | 1601                             |                            |
| 7,12-Dimethylbenz[a]anthracene                    | 855        | Y                | 2819.70         | 2712                             |                            |
| Acenaphthene                                      | 898        | Y                | 1528.33         | 1486                             | Y                          |
| Acenaphthylene                                    | 781        | Y                | 1500.98         | 1454                             | Y                          |
| Acephate                                          | 143        | Y                | 1464.27         | 1420                             | Y                          |
| Acibenzolar-S-methyl                              | 861        | Y                | 1900.60         |                                  |                            |
| Alachlor                                          | 689        | Y                | 1889.49         | 1894                             |                            |
| Aldrin                                            | 903        | Y                | 1940.09         | 1955                             |                            |
| Allyl 2,4,6-tribromophenyl ether                  | 773        | Y                | 1753.50         |                                  |                            |
| alpha-1,2,3,4,5,6-Hexachlorocyclohexane           | 822        | Y                | 1732.42         | 1693                             |                            |
| alpha-1,2-Dibromo-4-(1,2-dibromoethyl)cyclohexane | 865        | Y                | 1992.50         |                                  |                            |
| alpha-Amylcinnamaldehyde                          | 951        | Y                | 1651.24         | 1659                             | Y                          |
| alpha-Amylcinnamyl alcohol                        | 898        |                  | 1688.80         | 1675                             |                            |
| alpha-Hexylcinnamaldehyde                         | 951        |                  | 1751.05         | 1750                             | Y                          |
| Ametryn                                           | 867        | Y                | 1892.00         | 1898                             |                            |
| Aminocarb                                         | 925        | Y                | 1743.20         | 1770                             |                            |

| Name                                             | NIST Match | HBM4EU CECscreen | Experimental RI | NIST consensus semi non-polar RI | Common with open libraries |
|--------------------------------------------------|------------|------------------|-----------------|----------------------------------|----------------------------|
| Amitraz                                          | 946        |                  | 2563.60         | 2559                             |                            |
| Anthanthrene                                     | 590        | Y                | 3283.45         | 3185                             |                            |
| Anthracene                                       | 903        | Y                | 1844.37         | 1775                             | Y                          |
| anti-Dechlorane plus                             |            | Y                | 3412.90         |                                  |                            |
| Atrazine                                         | 604        | Y                | 1730.38         | 1746                             |                            |
| Azoxystrobin                                     |            | Y                | 3076.10         | 3076                             |                            |
| Benalaxyl                                        | 831        | Y                | 2388.60         | 2313                             |                            |
| Bendiocarb                                       | 886        | Y                | 1647.10         | 1667                             |                            |
| Benzanthracene/Benzophenanthrene                 |            | Y                | 2469.98         | 2441                             |                            |
| Benzo(a)pyrene                                   | 945        | Y                | 2858.04         | 2790                             | Y                          |
| Benzo(g,h,i)perylene                             | 954        | Y                | 3243.52         | 3150                             |                            |
| Benzo(k)fluoranthene                             | 943        | Y                | 2777.20         | 2748                             | Y                          |
| Benzo[b]naphtho[2,1-d]thiophene                  | 882        | Y                | 2419.34         | 2359                             |                            |
| Benzo[e]pyrene                                   | 953        |                  | 2843.99         | 2771                             |                            |
| Benzo[ghi]fluoranthene                           | 902        | Y                | 2407.20         |                                  |                            |
| Benzofluoranthene                                |            | Y                | 2769.96         |                                  |                            |
| Benzophenone                                     | 846        | Y                | 1659.58         | 1666                             | Y                          |
| Benzoximate                                      |            | Y                | 1925.60         |                                  |                            |
| Benzyl alcohol                                   | 868        | Y                | 1033.20         | 1036                             | Y                          |
| Benzyl benzoate                                  | 895        | Y                | 1776.60         | 1762                             | Y                          |
| Benzyl cinnamate                                 | 882        | Y                | 2110.20         | 2135                             |                            |
| Benzyl salicylate                                | 929        | Y                | 1882.40         | 1869                             | Y                          |
| beta-1,2-Dibromo-4-(1,2-dibromoethyl)cyclohexane | 843        | Y (alpha above)  | 2006.10         |                                  |                            |
| beta-Hexachlorocyclohexane                       | 911        | Y                | 1775.60         | 1741                             |                            |
| Bifenazate                                       | 869        | Y                | 2450.20         | 2515                             |                            |
| Bifenthrin                                       | 870        |                  | 2464.20         | 2470                             |                            |

| Name                     | NIST Match | HBM4EU CECscreen | Experimental RI | NIST consensus semi non-polar RI | Common with open libraries |
|--------------------------|------------|------------------|-----------------|----------------------------------|----------------------------|
| Bisphenol A              | 805        |                  | 2195.20         | 2108                             |                            |
| Bitertanol_isomer1       | 860        | Y                | 2714.60         | 2637                             |                            |
| Bitertanol_isomer2       | 841        | (as above)       | 2725.00         | 2648                             |                            |
| Boscalid                 | 774        | Y                | 2830.20         |                                  |                            |
| Bromuconazole_isomer1    | 848        | Y                | 2485.50         | 2487                             |                            |
| Bromuconazole_isomer2    | 796        | (as above)       | 2527.80         | 2487                             |                            |
| Bumetrizole              |            | Y                | 2541.48         |                                  |                            |
| Bupirimate               | 816        | Y                | 2206.20         | 2202                             |                            |
| Buprofezin               | 902        | Y                | 2197.80         | 2195                             |                            |
| Butafenacil              | 848        | Y                | 2741.70         |                                  |                            |
| Butylated hydroxytoluene | 754        | Y                | 1516.07         | 1513                             |                            |
| Camphor                  | 890        | Y                | 1156.46         | 1142                             | Y                          |
| Carbaryl                 | 892        | Y                | 1908.00         | 1901                             | Y                          |
| Carbetamide              | 853        | Y                | 2009.30         | 1974                             |                            |
| Carbofuran               | 939        | Y                | 1703.80         | 1735                             |                            |
| Carbofuran phenol        | 941        | Y                | 1292.20         | 1286                             |                            |
| Carboxin                 | 854        | Y                | 2221.00         | 2189                             |                            |
| Carfentrazone-ethyl      |            | Y                | 2335.60         | 2327                             |                            |
| Cashmeran                | 905        | Y                | 1493.70         | 1508                             |                            |
| Celestolide              | 907        | Y                | 1696.07         | 1707                             |                            |
| Chlorferone              |            | Y                | 2275.41         |                                  |                            |
| Chlorpyrifos             | 750        | Y                | 1977.26         | 1973                             |                            |
| Chlorpyrifos oxon        | 822        | Y                | 1968.14         | 1973                             |                            |
| Cinnamaldehyde           | 971        |                  | 1278.08         | 1274                             | Y                          |
| Cinnamyl alcohol         | 920        |                  | 1309.50         | 1313                             | Y                          |
| cis-Allethrin            | 846        |                  | 2071.80         |                                  |                            |

| Name                        | NIST Match | HBM4EU CECscreen | Experimental RI | NIST consensus semi non-polar RI | Common with open libraries |
|-----------------------------|------------|------------------|-----------------|----------------------------------|----------------------------|
| cis-Chlordane               | 895        | Y                | 2112.09         | 2111                             |                            |
| cis-Cyfluthrin_isomer1      | 650        | Y                | 2764.18         |                                  |                            |
| cis-Cyfluthrin_isomer2      |            | (as above)       | 2787.22         |                                  |                            |
| cis-Cypermethrin_isomer1    |            | Y                | 2809.30         | 2574                             |                            |
| cis-Cypermethrin_isomer2    | 730        | (as above)       | 2831.80         | 2774                             |                            |
| cis-Cyphenothrin            |            | Y                | 2652.77         |                                  |                            |
| cis-Fenvalerate             | 819        | Y                | 2945.03         | 2847                             |                            |
| cis-Heptachlor epoxide      | 872        |                  | 2026.06         | 2059                             |                            |
| cis-Permethrin              | 825        |                  | 2686.26         | 2648                             |                            |
| cis-Phenothrin              | 863        | Y                | 2517.10         | 2524                             |                            |
| cis-Prallethrin             | 823        | Y                | 2096.98         | 2136                             |                            |
| cis-Resmethrin              | 810        |                  | 2394.50         | 2394                             |                            |
| cis-Tetramethrin            | 716        |                  | 2448.80         |                                  |                            |
| Coronene                    | 688        | Y                | 3652.60         | 3498                             | Y                          |
| Coumarin                    | 957        | Y                | 1446.80         | 1441                             | Y                          |
| Cyazofamid                  | 528        | Y                | 2429.80         | 2388                             |                            |
| Cycluron                    | 856        | Y                | 1752.20         | 1760                             |                            |
| Cyproconazole_isomer1       | 868        | Y                | 2235.30         | 2236                             |                            |
| Cyproconazole_isomer2       | 860        | (as above)       | 2239.80         | 2339                             |                            |
| delta-Hexachlorocyclohexane | 829        | Y                | 1842.60         | 1801                             |                            |
| delta-Iraldeine             | 802        |                  | 1500.30         | 1506                             |                            |
| Deltamethrin                | 620        | Y                | 3045.50         | 3059                             |                            |
| Diazinone                   | 650        | Y                | 1791.02         | 1791                             |                            |
| Dibenzanthracene            |            | Y                | 3190.46         |                                  |                            |
| Diclobutrazol               | 818        |                  | 2205.20         | 2191                             |                            |
| Dicofol                     |            | Y                | 2379.70         | 2467                             |                            |



| Name                          | NIST Match | HBM4EU CECscreen | Experimental RI | NIST consensus semi non-polar RI | Common with open libraries |
|-------------------------------|------------|------------------|-----------------|----------------------------------|----------------------------|
| Dicrotophos                   | 777        | Y                | 1656.09         | 1656                             |                            |
| Diethofencarb                 | 794        | Y                | 1966.60         | 1964                             |                            |
| Difenoconazole_isomer1        | 757        | Y                | 3010.30         | 3017                             |                            |
| Difenoconazole_isomer2        | 756        | (as above)       | 3016.20         | 3025                             |                            |
| Diflubenzuron                 |            | Y                | 1298.90         |                                  |                            |
| Dimethachlor                  | 876        | Y                | 1854.55         | 1863                             |                            |
| Dimethoate                    | 819        | Y                | 1702.17         | 1720                             | Y                          |
| Dimethomorph_isomer1          |            | Y                | 3076.97         | 3080                             |                            |
| Dimethomorph_isomer2          |            | (as above)       | 3111.30         | 3159                             |                            |
| Diniconazole                  | 734        |                  | 2263.70         | 2370                             |                            |
| Dioxacarb                     | 870        | Y                | 1872.81         | 1850                             |                            |
| Drometrizole                  | 850        |                  | 2085.60         |                                  |                            |
| Endosulfan                    | 785        | Y                | 2024.49         | 2114                             |                            |
| Endosulfan sulphate           | 825        | Y                | 2328.83         | 2328                             |                            |
| Endrin                        | 905        |                  | 2205.33         | 2211                             |                            |
| Endrin aldehyde               | 855        |                  | 2275.78         | 2261                             |                            |
| Endrin ketone                 | 914        |                  | 2430.05         | 2426                             |                            |
| Enilconazole                  | 747        |                  | 2158.30         | 2161                             |                            |
| Enzacamene                    |            |                  | 2079.00         |                                  |                            |
| Epoxiconazole                 | 855        | Y                | 2463.90         | 2425                             |                            |
| epsilon-Hexachlorocyclohexane |            | Y                | 1865.93         |                                  |                            |
| Estragole                     | 934        | Y                | 1202.15         | 1196                             | Y                          |
| Estrone                       | 929        | Y                | 2701.20         | 2694                             | Y                          |
| Ethiofencarb                  | 842        | Y                | 1850.20         | 1837                             |                            |
| Ethiprole                     |            | Y                | 2434.50         |                                  |                            |
| Ethofumesate                  | 866        | Y                | 1954.40         | 1938                             |                            |

| Name                  | NIST Match | HBM4EU CECscreen | Experimental RI | NIST consensus semi non-polar RI | Common with open libraries |
|-----------------------|------------|------------------|-----------------|----------------------------------|----------------------------|
| Etoazole              | 881        | Y                | 2491.50         | 2489                             |                            |
| Eucalyptol            |            | Y                | 1037.80         | 1032                             | Y                          |
| Eugenol               | 957        | Y                | 1355.58         | 1357                             | Y                          |
| Fenamidone            | 812        | Y                | 2516.10         | 2499                             |                            |
| Fenarimol             | 820        | Y                | 2638.90         | 2579                             |                            |
| Fenazaquin            | 918        | Y                | 2559.00         | 2506                             |                            |
| Fenhexamid            | 887        | Y                | 2416.60         |                                  |                            |
| Fenobucarb            | 945        | Y                | 1582.00         | 1608                             |                            |
| Fenoxaprop-ethyl      | 779        | Y                | 2684.27         |                                  |                            |
| Fenoxycarb            | 789        | Y                | 2487.80         | 2459                             |                            |
| Fenpropathrin         | 824        | Y                | 2481.19         | 2495                             |                            |
| Fenpropimorph_isomer1 | 823        | Y                | 1911.80         |                                  |                            |
| Fenpropimorph_isomer2 | 833        | (as above)       | 1954.80         |                                  |                            |
| Fipronil              | 774        | Y                | 2045.70         | 2052                             |                            |
| Flucythrinate_isomer1 | 834        |                  | 2833.70         | 2844                             |                            |
| Flucythrinate_isomer2 | 731        |                  | 2862.27         | 2844                             |                            |
| Fludioxonil           | 863        | Y                | 2240.80         | 2169                             |                            |
| Flufenacet            | 893        | Y                | 1983.70         |                                  |                            |
| Fluoranthene          | 970        | Y                | 2102.69         | 2054                             | Y                          |
| Fluquinconazole       | 905        | Y                | 2744.90         | 2729                             |                            |
| Flusilazole           | 750        | Y                | 2204.80         | 2192                             |                            |
| Flutolanil            | 933        | Y                | 2130.00         | 2147                             |                            |
| Flutriafol            | 919        | Y                | 2126.70         | 2155                             |                            |
| Fuberidazole          | 906        | Y                | 1921.20         | 1891                             |                            |
| Furalaxyl             | 844        | Y                | 2065.00         | 2074                             |                            |
| Furathiocarb          | 778        | Y                | 2521.00         | 2508                             |                            |

| Name                        | NIST Match | HBM4EU CECscreen | Experimental RI | NIST consensus semi non-polar RI | Common with open libraries |
|-----------------------------|------------|------------------|-----------------|----------------------------------|----------------------------|
| Galaxolide                  | 891        | Y                | 1830.61         | 1851                             |                            |
| Geranial                    | 872        | Y                | 1268.00         | 1270                             |                            |
| Heptachlor                  | 909        | Y                | 1871.08         | 1887                             |                            |
| Hexabromobenzene            | 703        | Y                | 2475.30         | 2473                             |                            |
| Hexachlorobenzene           | 930        | Y                | 1744.46         | 1707                             | Y                          |
| Hexaconazole                | 843        | Y                | 2125.50         | 2150                             |                            |
| Hydroxychrysene             | 890        | Y                | 2864.21         |                                  |                            |
| Hydroxyfluorenone           | 901        | Y                | 1751.11         |                                  |                            |
| Indeno[1,2,3-cd]pyrene      | 826        | Y                | 3177.05         | 3095                             |                            |
| Indoxacarb                  | 756        | Y                | 3019.30         |                                  |                            |
| Ipconazole                  | 874        | Y                | 2595.00         |                                  |                            |
| Iprovalicarb isomer 1       | 842        | Y                | 2168.30         |                                  |                            |
| Iprovalicarb isomer 2       | 837        | (as above)       | 2205.10         |                                  |                            |
| Isocarbophos                | 683        | Y                | 2005.30         |                                  |                            |
| Isodecyl diphenyl phosphate | 835        |                  | 2427.00         |                                  |                            |
| Isoeugenol                  | 849        | Y                | 1452.11         | 1450                             | Y                          |
| Isomethyl-alpha-ionone      | 929        |                  | 1479.90         | 1480                             |                            |
| Isoproc carb                | 898        | Y                | 1511.80         | 1532                             |                            |
| Kresoxim-methyl             | 931        | Y                | 2211.30         | 2202                             |                            |
| lambda-Cyhalothrin          | 764        | Y                | 2585.27         | 2565                             |                            |
| Lilial                      | 927        | Y                | 1532.00         | 1534                             |                            |
| Limonene                    | 879        | Y                | 1032.90         | 1030                             | Y                          |
| Lindane                     | 889        | Y                | 1798.00         | 1754                             | Y                          |
| Linuron                     | 689        | Y                | 1954.10         | 1946                             |                            |
| Malathion                   | 877        | Y                | 1964.44         | 1959                             | Y                          |
| Mefenacet                   | 885        | Y                | 2584.70         | 2566                             |                            |

| Name                       | NIST Match | HBM4EU CECscreen | Experimental RI | NIST consensus semi non-polar RI | Common with open libraries |
|----------------------------|------------|------------------|-----------------|----------------------------------|----------------------------|
| Mepanipyrim                | 837        | Y                | 2096.60         | 2134                             |                            |
| Mepronil                   | 716        | Y                | 2296.40         | 2298                             | Y                          |
| Metalaxyl                  | 842        | Y                | 1906.80         | 1903                             |                            |
| Metazachlor                | 685        | Y                | 2036.81         | 2043                             |                            |
| Metconazole                | 869        | Y                | 2520.10         |                                  |                            |
| Methabenzthiazuron         |            | Y                | 1648.30         |                                  |                            |
| Methiocarb                 | 720        | Y                | 1946.60         | 1932                             |                            |
| Methomyl                   |            | Y                | 1568.50         | 1532                             |                            |
| Methoprotryne              | 750        | Y                | 2207.70         | 2193                             |                            |
| Methoxychlor               | 904        | Y                | 2475.70         | 2453                             |                            |
| Methyl parathion           | 818        | Y                | 1890.00         | 1876                             | Y                          |
| Methyleugenol              | 943        | Y                | 1398.78         | 1402                             |                            |
| Metobromuron               | 869        | Y                | 1843.90         | 1837                             |                            |
| Metolachlor                | 873        | Y                | 1956.20         |                                  |                            |
| Metribuzin                 | 769        | Y                | 1876.10         | 1864                             |                            |
| Mevinphos                  | 774        | Y                | 1445.50         | 1419                             |                            |
| Mexacarbate                | 929        | Y                | 1812.30         |                                  |                            |
| Mirex                      | 933        | Y                | 2586.68         | 2530                             |                            |
| Monocrotophos              | 870        | Y                | 1723.10         | 1662                             |                            |
| Monolinuron                | 920        | Y                | 1705.30         | 1740                             |                            |
| Myclobutanil               | 923        | Y                | 2197.70         | 2198                             | Y                          |
| Nuarimol                   | 843        | Y                | 2440.10         | 2374                             |                            |
| Octachlorodibenzofuran     |            | Y                | 3099.39         | 3147                             |                            |
| Octachlorodibenzo-p-dioxin |            | Y                | 3097.63         | 3197                             |                            |
| Octrizole                  | 757        | Y                | 2571.94         |                                  |                            |
| Oxadixyl                   | 743        | Y                | 2295.70         | 2268                             |                            |

| Name                  | NIST Match | HBM4EU CECscreen | Experimental RI | NIST consensus semi non-polar RI | Common with open libraries |
|-----------------------|------------|------------------|-----------------|----------------------------------|----------------------------|
| Paclobutrazol         | 852        |                  | 2084.00         | 2109                             |                            |
| para-Terphenyl        | 897        |                  | 2207.51         | 2152                             |                            |
| Penconazole           | 844        | Y                | 2037.70         | 2045                             |                            |
| Pendimethalin         | 804        | Y                | 2044.58         | 2038                             |                            |
| Pentabromobenzene     |            | Y                | 2083.60         |                                  |                            |
| Pentachlorobenzene    | 864        | Y                | 1554.64         | 1511                             |                            |
| Perylene              | 935        | Y                | 2886.93         | 2815                             | Y                          |
| Perylene_2H12         | 818        |                  | 2875.96         |                                  |                            |
| Phantolide            | 869        | Y                | 1737.42         |                                  |                            |
| Phenanthrene          | 916        | Y                | 1832.86         | 1775                             | Y                          |
| Phenanthrene_2H10     | 866        | Y                | 1827.10         | 1784                             |                            |
| Phosmet               | 915        |                  | 2460.21         | 2445                             |                            |
| Picoxystrobin         | 937        | Y                | 2105.40         |                                  |                            |
| Piperonyl butoxide    | 874        | Y                | 2431.90         | 2396                             |                            |
| Pirimicarb            | 778        | Y                | 1829.60         | 1837                             |                            |
| Praziquantel          | 916        | Y                | 2970.57         |                                  |                            |
| Progesterone          | 906        | Y                | 2892.70         |                                  | Y                          |
| Promecarb             | 916        | Y                | 1652.70         | 1687                             |                            |
| Prometon              | 867        | Y                | 1691.20         | 1727                             |                            |
| Prometryn             | 875        | Y                | 1894.10         | 1905                             |                            |
| Propargite_isomer1    | 821        | Y                | 2426.80         | 2387                             |                            |
| Propargite_isomer2    | 860        | (as above)       | 2429.50         | 2387                             |                            |
| Propham               | 912        | Y                | 1428.80         | 1453                             |                            |
| Propiconazole_isomer1 | 726        | Y                | 2404.40         | 2336                             |                            |
| Propiconazole_isomer2 | 831        | (as above)       | 2412.00         | 2351                             |                            |
| Propoxur              | 909        | Y                | 1588.60         | 1606                             |                            |

| Name                | NIST Match | HBM4EU CECscreen | Experimental RI | NIST consensus semi non-polar RI | Common with open libraries |
|---------------------|------------|------------------|-----------------|----------------------------------|----------------------------|
| Pyracarbolid        | 858        | Y                | 2019.90         |                                  |                            |
| Pyraclostrobin      | 819        | Y                | 2964.19         | 2967                             |                            |
| Pyrene              | 969        | Y                | 2154.49         | 2091                             | Y                          |
| Pyridaben           | 892        | Y                | 2723.80         | 2648                             |                            |
| Pyrimethanil        | 765        | Y                | 1769.70         | 1793                             |                            |
| Pyriproxyfen        | 848        | Y                | 2557.70         | 2574                             |                            |
| Quinoxyfen          | 762        | Y                | 2403.20         | 2347                             |                            |
| Retene              | 852        | Y                | 2236.17         | 2198                             |                            |
| Rotenone            | 644        | Y                | 3213.70         | 3242                             |                            |
| Safrole             | 910        | Y                | 1296.00         | 1287                             | Y                          |
| Secbumeton          | 847        | Y                | 1805.00         | 1804                             |                            |
| Siduron             | 666        | Y                | 2153.50         | 2132                             |                            |
| Simetryn            |            | Y                | 1890.90         | 1902                             |                            |
| Spirodiclofen       |            | Y                | 2708.90         | 2690                             |                            |
| Spiromesifen        | 732        | Y                | 2456.30         |                                  |                            |
| Spirotetramat       |            |                  | 2767.80         |                                  |                            |
| Spiroxamine_isomer1 | 843        | Y                | 1859.10         | 1896                             |                            |
| Spiroxamine_isomer2 | 811        | (as above)       | 1907.20         | 1949                             |                            |
| Sulfentrazone       | 867        | Y                | 2507.80         |                                  |                            |
| syn-Dechlorane plus |            | Y (anti above)   | 3373.90         |                                  |                            |
| Tebuconazole        | 830        | Y                | 2434.30         | 2391                             |                            |
| Tebufenpyrad        | 899        | Y                | 2493.50         | 2501                             |                            |
| Tebuthiuron         | 857        | Y                | 1523.20         | 1504                             |                            |
| Tefluthrin          | 812        | Y                | 1811.79         |                                  |                            |
| Temephos            | 600        | Y                | 3218.50         | 3097                             |                            |
| Terbufos            | 896        | Y                | 1748.90         | 1768                             |                            |

| Name                       | NIST Match | HBM4EU CECscreen | Experimental RI | NIST consensus semi non-polar RI | Common with open libraries |
|----------------------------|------------|------------------|-----------------|----------------------------------|----------------------------|
| Terbumeton                 | 876        | Y                | 1721.00         | 1738                             |                            |
| Terbutylazine              | 839        | Y                | 1758.80         | 1771                             |                            |
| Terbutryn                  |            | Y                | 1927.70         | 1928                             |                            |
| Testosterone               | 926        | Y                | 2733.00         |                                  | Y                          |
| Tetraconazole              | 782        | Y                | 2000.40         | 1998                             |                            |
| Thiabendazole              | 869        | Y                | 2074.20         | 2052                             | Y                          |
| Thiobencarb                | 882        | Y                | 1957.00         | 1974                             |                            |
| Thiofanox                  |            | Y                | 1214.20         | 1277                             |                            |
| Tonalide                   | 807        | Y                | 1845.27         | 1843                             |                            |
| trans-Allethrin            | 896        |                  | 2075.10         | 2062                             |                            |
| trans-Chlordane            | 856        |                  | 2079.00         | 2078                             |                            |
| trans-Cyfluthrin_isomer1   | 763        | Y                | 2779.20         |                                  |                            |
| trans-Cyfluthrin_Isomer2   | 726        | (as above)       | 2793.60         |                                  |                            |
| trans-Cypermethrin_isomer1 | 797        | Y                | 2817.29         | 2766                             |                            |
| trans-Cypermethrin_isomer2 | 699        | (as above)       | 2841.71         | 2777                             |                            |
| trans-Cyphenothrin         |            | Y (cis above)    | 2656.66         |                                  |                            |
| trans-Fenvalerate          | 707        | Y (cis above)    | 2965.30         | 2847                             |                            |
| Transfluthrin              | 881        | Y                | 1902.49         | 1910                             |                            |
| trans-Permethrin           | 841        | Y                | 2701.88         | 2657                             |                            |
| trans-Phenothrin           | 831        | Y                | 2532.40         | 2524                             |                            |
| trans-Prallethrin          | 844        | Y (cis above)    | 2102.15         | 2136                             |                            |
| trans-Resmethrin           | 831        |                  | 2407.62         | 2394                             |                            |
| trans-Tetramethrin         | 895        | Y                | 2468.00         |                                  |                            |
| Traseolide                 | 788        | Y                | 1830.96         | 1830                             |                            |
| Triadimefon                | 771        | Y                | 1987.90         | 1986                             |                            |
| Triadimenol_isomer1        | 885        | Y                | 2056.90         | 2076                             |                            |

| Name                                 | NIST Match | HBM4EU CECscreen | Experimental RI | NIST consensus semi non-polar RI | Common with open libraries |
|--------------------------------------|------------|------------------|-----------------|----------------------------------|----------------------------|
| Triadimenol_isomer2                  | 708        | (as above)       | 2070.70         | 2083                             |                            |
| Triclosan                            | 784        | Y                | 2122.80         | 2114                             |                            |
| Tricyclazole                         | 762        | Y                | 2214.60         | 2158                             |                            |
| Trifloxystrobin                      | 863        |                  | 2399.00         | 2339                             |                            |
| Triflumizole                         | 755        |                  | 2061.50         | 2080                             |                            |
| Trifluralin                          | 811        | Y                | 1666.18         | 1669                             | Y                          |
| Tri-m-cresyl phosphate               | 840        | Y                | 2686.60         | 2664                             |                            |
| Tri-n-butyl-phosphate                | 890        | Y                | 1628.13         | 1655                             |                            |
| Tri-o-cresyl phosphate               | 945        | Y                | 2611.20         | 2555                             |                            |
| Tri-p-cresyl-phosphate               | 892        |                  | 2784.00         |                                  |                            |
| Triphenyl phosphate                  | 833        | Y                | 2400.00         | 2387                             | Y                          |
| Triphenylene                         | 917        | Y                | 2463.80         | 2416                             | Y                          |
| Tris(1,3-dichloro-2-propyl)phosphate | 825        | Y                | 2338.54         | 2251                             |                            |
| Tris(1-chloro-2-propyl) phosphate    | 679        | Y                | 1783.15         | 1816                             |                            |
| Tris(2-butoxyethyl) phosphate        | 842        | Y                | 2407.00         | 2421                             |                            |
| Tris(2-chloroethyl) phosphate        | 912        | Y                | 1756.00         | 1777                             |                            |
| Tris(2-ethylhexyl) phosphate         | 836        | Y                | 2465.00         | 2463                             |                            |
| Tris(3,5-xylenyl)phosphate           |            |                  | 2906.40         |                                  |                            |
| Tris(4-tert-butylphenyl) phosphate   | 800        | Y                | 3270.93         |                                  |                            |
| Tris(isopropylphenyl)phosphate       | 868        |                  | 2815.13         |                                  |                            |
| Triticonazole                        | 828        |                  | 2553.00         |                                  |                            |
| Vamidotion                           | 724        | Y                | 2125.30         | 2109                             |                            |
| Zoxamide                             | 633        | Y                | 2453.90         | 2428                             |                            |
